# Supplementary material
Source: PubMed Central journal article supplement (PMC2680205)

**Figure S1: Haplotype relationships among DYS19 duplication chromosomes of known and unknown haplogroup.**

Weighted median joining network [33] containing the 6-locus Y-STR haplotypes (DYS389I, DYS389II-I, DYS390, DYS391, DYS392, DYS393) of 51 duplication chromosomes of known haplogroup from our study, together with 10 published chromosomes known to belong to hgG [10], and 94 duplication chromosomes of unknown haplogroup from the YHRD. Circles represent haplotypes, with area proportional to frequency. Examples of known haplogroup are filled and coloured accordingly; examples from the YHRD with inferred haplogroup are edged in the appropriate colour. Note that the larger number of reticulations in this network compared to that in Figure 2, despite the same weighting scheme being applied, is due to the smaller number of Y-STRs in each haplotype.

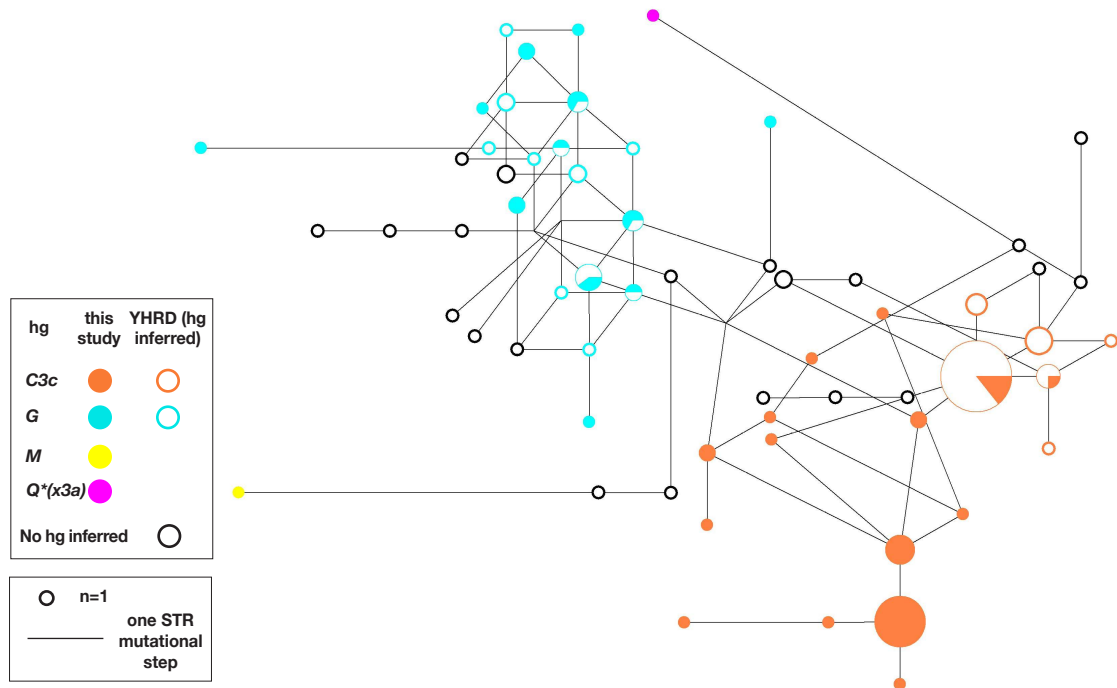

Supplement: NIHMS4598-supplement-Figure_S1.pdf [file NIHMS4598-supplement-Figure_S1.pdf]
